# Supplementary material for: A Critical Review on the Status and Progress of Microalgae Cultivation in Outdoor Photobioreactors Conducted over 35 Years (1986–2021)
Source: MDPI journal article supplement (doi:10.3390/en16073105), 2023-03-29
Supplement: s1 [file s1]

**Table S1.** List of documents published on algal cultivation in outdoor PBRs.

| Title                                                                                                                                                                                      | DOI                                                            | Authors                         | Reference |
|--------------------------------------------------------------------------------------------------------------------------------------------------------------------------------------------|----------------------------------------------------------------|---------------------------------|-----------|
| Outdoor Cultivation of Temperature-Tolerant <i>Chlorella sorokiniana</i> in a Column Photobioreactor                                                                                       | 10.1002/bit.24603                                              | Bechet et al. (2012)            | [39]      |
| A Model for Light Distribution and Average Solar Irradiance Inside Outdoor Tubular Photobioreactors for the Microalgal Mass Culture                                                        | 10.1002/(SICI)1097-0290(19970905)55:5<701::AID-BIT1>3.0.CO;2-F | Fernandez et al. (1997)         | [89]      |
| Improvement of mass transfer characteristics and productivities of inclined tubular photobioreactors by installation of internal static mixers                                             | 10.1007/s00253-002-0940-9                                      | Ugwu et al. (2002)              | [58]      |
| Biomass and Lipid Production of <i>Dinoflagellates</i> and <i>Raphidophytes</i> in Indoor and Outdoor Photobioreactors                                                                     | 10.1007/s10126-012-9450-7                                      | Fuentes-Grünewald et al. (2012) | [47]      |
| Pilot-scale outdoor photobioreactor culture of the marine dinoflagellate <i>Karlodinium veneticum</i> : Production of a karlotoxins-rich extract                                           | 10.1016/j.biortech.2017.12.101                                 | López-Rosales et al. (2018)     | [73]      |
| Passive temperature solar control of an outdoor photobioreactor                                                                                                                            | 10.1016/j.renene.2007.11.004                                   | Gutierrez et al. (2008)         | [126]     |
| Evaluation of <i>Chlorella sorokiniana</i> cultivated in outdoor photobioreactors for biodiesel production                                                                                 | 10.1080/17597269.2020.1763094                                  | Menegazzo et al. (2020)         | [59]      |
| Outdoor cultivation of <i>Ulva lactuca</i> in a recently developed ring-shaped photobioreactor: effects of elevated CO <sub>2</sub> concentration on growth and photosynthetic performance | 10.1515/bot-2018-0016                                          | Sebökö et al. (2018)            | [127]     |
| <i>Chlorella</i> for protein and biofuels: from strain selection to outdoor cultivation in a Green Wall Panel photobioreactor                                                              | 10.1186/1754-6834-7-84                                         | Guccione et al. (2014)          | [124]     |
| Productivity of Outdoor Algal Cultures in Enclosed Tubular Photobioreactor                                                                                                                 | 10.1002/bit.260400917                                          | Lee and Low (1992)              | [55]      |
| Dynamic modeling of temperature change in outdoor operated tubular photobioreactors                                                                                                        | 10.1007/s00449-017-1765-3                                      | Androga et al. (2017)           | [104]     |
| Biomass Accumulation of <i>Chlorella Zofingiensis</i> G1 Cultures Grown Outdoors in Photobioreactors                                                                                       | 10.3389/fenrg.2018.00049                                       | Huo et al. (2018)               | [64]      |
| Prediction of Volumetric Productivity of an Outdoor Photobioreactor                                                                                                                        | 10.1002/bit.21319                                              | Bosma et al. (2006)             | [75]      |
| An Interactive Tool for Outdoor Computer Controlled Cultivation of Microalgae in a Tubular Photobioreactor System                                                                          | 10.3390/s140304466                                             | Dormido et al. (2014)           | [33]      |
| Airlift-driven external-loop tubular photobioreactors for outdoor production of microalgae: assessment of design and performance                                                           | 10.1016/S0009-2509(00)00521-2                                  | Fernández et al. (2001)         | [90]      |
| Eicosapentaenoic acid production from <i>Nannochloropsis oceanica</i> CY2 using deep sea water in outdoor plastic-bag type photobioreactors                                                | 10.1016/j.biortech.2017.12.102                                 | Chen et al. (2018)              | [78]      |
| A novel horizontal photobioreactor for high-density cultivation of microalgae                                                                                                              | 10.1016/j.biortech.2015.09.030                                 | Dogaris et al. (2009)           | [77]      |
| Outdoor Cultivation of the Microalga <i>Chlorella vulgaris</i> in a New Photobioreactor Configuration: The Effect of Ultraviolet and Visible Radiation                                     | 10.3390/en13081962                                             | Lopes et al. (2020)             | [61]      |
| Lipid accumulation and growth of <i>Chlorella zofingiensis</i> in flat plate photobioreactors outdoors                                                                                     | 10.1016/j.biortech.2011.08.109                                 | Feng et al. (2011)              | [65]      |
| Comparison of Microalgae cultivation in Photobioreactor, Open raceway Pond, and a Two-stage hybrid system                                                                                  | 10.3389/fenrg.2016.00029                                       | Narala et al. (2016)            | [121]     |
| Outdoor Helical Tubular Photobioreactors for Microalgal Production: Modeling of Fluid-Dynamics and Mass Transfer and Assessment of Biomass Productivity                                    | 10.1002/bit.10543                                              | Hall et al. (2002)              | [91]      |
| Irradiance optimization of outdoor microalgal cultures using solar tracked photobioreactors                                                                                                | 10.1007/s00449-012-0790-5                                      | Hindersin et al. (2013)         | [62]      |
| Energy efficiency of an outdoor microalgal photobioreactor sited at mid-temperate latitude                                                                                                 | 10.1016/j.biortech.2011.03.098                                 | Hulatt et al. (2011)            | [107]     |
| Outdoor Growth Characterization of an Unknown Microalga Screened from Contaminated <i>Chlorella</i> Culture                                                                                | 10.1155/2017/5681617                                           | Huo et al. (2017)               | [123]     |

|                                                                                                                                                                                                                                                          |                                                               |                              |       |
|----------------------------------------------------------------------------------------------------------------------------------------------------------------------------------------------------------------------------------------------------------|---------------------------------------------------------------|------------------------------|-------|
| Effects of Environmental Factors on the Growth, Optical Density and Biomass of the Green Algae <i>Chlorella Vulgaris</i> in Outdoor Conditions                                                                                                           | 10.4314/jasem.v20i1.16                                        | Fatemeh and Mohsen (2016)    | [63]  |
| Enhanced Oil Production by the Tropical Marine Diatom <i>Thalassiosira</i> Sp. Cultivated in Outdoor Photobioreactors                                                                                                                                    | 10.1007/s12010-017-2421-8                                     | Kusumaningtyas et al. (2017) | [122] |
| Modeling Microalgae Productivity in Industrial- Scale Vertical Flat-Panel Photobioreactors                                                                                                                                                               | 10.1021/acs.est.7b05545                                       | Endres et al. (2018)         | [38]  |
| Operational Strategies for Cost Effective Mass Cultivation of Halophilic Microalgal Strain <i>Pseudanabaena limnetica</i> in 1000 L Flat-Panel Photobioreactor                                                                                           | 10.4172/2157-7463.1000380                                     | Sampat and Arun (2018)       | [37]  |
| Outdoor Large-Scale Cultivation of the Acidophilic Microalga <i>Coccomyxa onubensis</i> in a Vertical Close Photobioreactor for Lutein Production                                                                                                        | 10.3390/pr8030324                                             | Fuentes et al. (2020)        | [153] |
| Design tool and guidelines for outdoor photobioreactors                                                                                                                                                                                                  | 10.1016/j.ces.2013.11.014                                     | Lee et al. (2014)            | [25]  |
| <i>Nannochloropsis</i> production metrics in a scalable outdoor photobioreactor for commercial applications                                                                                                                                              | 10.1016/j.biortech.2012.04.073                                | Quinn et al. (2012)          | [82]  |
| Prediction of Dissolved Oxygen and Carbon Dioxide Concentration Profiles in Tubular Photobioreactors for Microalgal Culture                                                                                                                              | 10.1002/(SICI)1097-0290(19990105)62:1<71::AID-BIT9>3.0.CO;2-T | Rubio et al. (1999)          | [103] |
| Comparison of four outdoor pilot-scale photobioreactors                                                                                                                                                                                                  | 10.1186/s13068-015-0400-2                                     | De-Vree et al. (2015)        | [85]  |
| Design scenarios of outdoor arrayed cylindrical photobioreactors for microalgae cultivation considering solar radiation and temperature                                                                                                                  | 10.1016/j.algal.2019.101515                                   | Huanga et al. (2019)         | [129] |
| Process of outdoor thin-layer cultivation of microalgae and blue-green algae and bioreactor for performing the process                                                                                                                                   | Patent Number: US5981271A                                     | Doucha et al. (1999)         | [135] |
| PHOTOBIOREACTOR SYSTEMS AND METHODS FOR GROWING ORGANISMS                                                                                                                                                                                                | Patent Number: US 2009/0203067 A1                             | ECKERLE et al. (2009)        | [154] |
| Selection of microalgae for biodiesel production in a scalable outdoor photobioreactor in north China                                                                                                                                                    | 10.1016/j.biortech.2014.10.008                                | Xia et al. (2014)            | [69]  |
| Techno-economics of algae production in the Arabian Peninsula                                                                                                                                                                                            | 10.1016/j.biortech.2021.125043                                | Schipper et al. (2021)       | [36]  |
| Outdoor performance of <i>Chlorococcum littorale</i> at different locations                                                                                                                                                                              | 10.1016/j.algal.2017.08.010                                   | Cabanelas et al. (2017)      | [66]  |
| Maximizing the solar to H <sub>2</sub> energy conversion efficiency of outdoor photobioreactors using mixed cultures                                                                                                                                     | 10.1016/j.ijhydene.2009.11.030                                | Berberoglu and Pilon (2010)  | [53]  |
| Use of concentric-tube airlift photobioreactors for microalgal outdoor mass cultures                                                                                                                                                                     | 10.1016/S0141-0229(98)00103-3                                 | Camacho et al. (1999)        | [92]  |
| Outdoor production of <i>Phaeodactylum tricornutum</i> biomass in a helical reactor                                                                                                                                                                      | 10.1016/S0168-1656(03)00101-9                                 | Fernandez et al. (2003)      | [93]  |
| Production and monitoring of biomass and fucoxanthin with brown microalgae under outdoor conditions                                                                                                                                                      | 10.1002/bit.27657                                             | Gao et al. (2021)            | [94]  |
| Developing microalgal oil production for an outdoor photobioreactor                                                                                                                                                                                      | 10.1007/s10811-021-02374-7                                    | Norsker et al. (2021)        | [26]  |
| Theoretical Investigation of Biomass Productivities Achievable in Solar Rectangular Photobioreactors for the Cyanobacterium <i>Arthrospira platensis</i>                                                                                                 | 10.1002/btpr.1540                                             | Pruvost et al. (2012)        | [22]  |
| Microalgae for Oil: Strain Selection, Induction of Lipid Synthesis and Outdoor Mass Cultivation in a Low-Cost Photobioreactor                                                                                                                            | 10.1002/bit.22033                                             | Rodolfi et al. (2009)        | [86]  |
| Seasonal variation of biomass and oil production of the oleaginous diatom <i>Fistulifera</i> sp. in outdoor vertical bubble column and raceway-type bioreactors                                                                                          | 10.1016/j.jbiosc.2013.11.017                                  | Sato et al. (2014)           | [70]  |
| Design scenarios for flat panel photobioreactors                                                                                                                                                                                                         | 10.1016/j.apenergy.2010.12.037                                | Slegers et al. (2011)        | [34]  |
| Evaluation of a vertical flat-plate photobioreactor for outdoor biomass production and carbon dioxide bio-fixation: effects of reactor dimensions, irradiation and cell concentration on the biomass productivity and irradiation utilization efficiency | 10.1007/s002530000550                                         | Zhang et al. (2001)          | [117] |

|                                                                                                                                                                          |                                                                |                              |       |
|--------------------------------------------------------------------------------------------------------------------------------------------------------------------------|----------------------------------------------------------------|------------------------------|-------|
| Photosynthetic performance of a cyanobacterium in a vertical flat-plate photobioreactor for outdoor microalgal production and fixation of CO <sub>2</sub>                | 10.1023/A:1026737000160                                        | Zhang et al. (2001)          | [125] |
| Feasibility of biodiesel production by microalgae <i>Chlorella</i> sp. (FACHB-1748) under outdoor conditions                                                             | 10.1016/j.biortech.2013.03.169                                 | Zhou et al. (2013)           | [60]  |
| Indoor and outdoor cultivation of <i>Chlorella vulgaris</i> and its application in wastewater treatment in a tropical city—Bangkok, Thailand                             | 10.1007/s42452-019-1704-9                                      | Sarker and Salam (2019)      | [10]  |
| Design of batch algal cultivation systems and ranking of the design parameters                                                                                           | 10.1007/s40974-020-00149-3                                     | Sarker and Salam (2020)      | [35]  |
| Exploring the potential of wastewater reclamation by means of outdoor cultivation of microalgae in photobioreactors                                                      | 10.1007/s40974-021-00207-4                                     | Sarker (2021)                | [54]  |
| Comparative analysis of the outdoor culture of <i>Haematococcus pluvialis</i> in tubular and bubble column photobioreactors                                              | 10.1016/j.jbiotec.2005.11.010                                  | Lopez et al. (2006)          | [72]  |
| A closed solar photobioreactor for cultivation of microalgae under supra-high irradiance: basic design and performance                                                   | 10.1023/A:1023849117102                                        | Masojídek et al. (2003)      | [109] |
| Production of Spirulina Biomass in Closed Photobioreactors                                                                                                               | 10.1016/0144-4565(86)90021-1                                   | Torzillo et al. (1986)       | [108] |
| Temperature as an Important Factor Affecting Productivity and Night Biomass Loss in <i>Spirulina platensis</i> Grown Outdoors in Tubular Photobioreactors                | 10.1016/0960-8524(91)90137-9                                   | Torzillo et al. (1991)       | [110] |
| Effect of temperature on yield and night biomass loss in <i>Spirulina platensis</i> grown outdoors in tubular photobioreactors                                           | 10.1007/BF00003691                                             | Torzillo et al. (1991)       | [111] |
| Use of chlorophyll fluorescence to estimate the effect of photoinhibition in outdoor cultures of <i>Spirulina platensis</i>                                              | 10.1007/BF02185901                                             | Vonshak et al. (1994)        | [112] |
| Productivity of Spirulina in a strongly curved outdoor tubular photobioreactor                                                                                           | 10.1007/s002530050642                                          | Carlozzi and Torzillo (1996) | [113] |
| Hydrodynamic aspects and Arthrospira growth in two outdoor tubular undulating row photobioreactors                                                                       | 10.1007/s002530000355                                          | Carlozzi (2000)              | [50]  |
| Lutein production by <i>Muriellopsis</i> sp. in an outdoor tubular photobioreactor                                                                                       | 10.1016/S0168-1656(00)00380-1                                  | Campo et al. (2001)          | [76]  |
| Transient analysis and performance studies of two tubular photobioreactors for outdoor culture of <i>Spirulina</i>                                                       | 10.1002/er.4440190603                                          | Prakash et al. (1995)        | [114] |
| Light and oxygen stress in <i>Spirulina platensis</i> (cyanobacteria) grown outdoors in tubular reactors                                                                 | 10.1111/j.1399-3054.1996.tb00494.x                             | Vonshak et al. (1996)        | [115] |
| Effect of Photobioreactor Inclination on the Biomass Productivity of an Outdoor Algal Culture                                                                            | 10.1002/bit.260380906                                          | Lee and Low (1991)           | [56]  |
| Absorber Tower as a Photobioreactor for Microalgae                                                                                                                       | 10.1023/A:1026663329682                                        | Petkov (2000)                | [128] |
| Production of <i>Chlorella</i> Biomass in Different Types of Flat Bioreactors in Temperate Zones                                                                         | 10.1016/0144-4565(86)90062-4                                   | De-Ortega and Roux (1986)    | [57]  |
| A new tubular reactor for mass production of microalgae outdoors                                                                                                         | 10.1007/BF02186235                                             | Richmond et al. (1993)       | [49]  |
| Biomass production and studies on <i>Rhodospseudomonas palustris</i> grown in an outdoor, temperature controlled, underwater tubular photobioreactor                     | 10.1016/s0168-1656(01)00280-2                                  | Carlozzi and Sacchi (2001)   | [105] |
| Production of eicosapentaenoic acid by <i>Nannochloropsis</i> sp. cultures in outdoor tubular photobioreactors                                                           | 10.1016/S0079-6352(99)80122-2                                  | Zittelli et al. (1999)       | [87]  |
| Growth characteristics of <i>Rhodospseudomonas palustris</i> cultured outdoors, in an underwater tubular photobioreactor, and investigation on photosynthetic efficiency | 10.1007/s00253-006-0550-z                                      | Carlozzi, et al. (2006)      | [106] |
| Invention of outdoor closed type photobioreactor for microalgae                                                                                                          | 10.1016/j.enconman.2005.06.010                                 | Sato et al. (2006)           | [52]  |
| A Two-Plane Tubular Photobioreactor for Outdoor Culture of Spirulina                                                                                                     | 10.1002/bit.260420714                                          | Torzillo et al. (1993)       | [116] |
| A vertical alveolar panel (VAP) for outdoor mass cultivation of microalgae and cyanobacteria                                                                             | 10.1016/0960-8524(91)90147-C                                   | Tredici et al. (1991)        | [48]  |
| Efficiency of Sunlight Utilization: Tubular Versus Flat Photobioreactors                                                                                                 | 10.1002/(SICI)1097-0290(19980120)57:2<187::AID-BIT7>3.0.CO;2-J | Tredici and Zittelli (1998)  | [51]  |
| Productivity of <i>Nannochloropsis oceanica</i> in an industrial closely spaced flat-panel photobioreactor                                                               | 10.1016/j.algal.2019.101632                                    | Norsker et al. (2019)        | [79]  |

|                                                                                                                                                                                          |                                   |                           |       |
|------------------------------------------------------------------------------------------------------------------------------------------------------------------------------------------|-----------------------------------|---------------------------|-------|
| <i>Neochloris oleoabundans</i> oil production in an outdoor tubular photobioreactor at pilot scale                                                                                       | 10.1007/s10811-021-02400-8        | Norsker et al. (2021)     | [67]  |
| Fucoanthin production from <i>Tisochrysis lutea</i> and <i>Phaeodactylum tricornutum</i> at industrial scale                                                                             | 10.1016/j.algal.2021.102322       | Pereira et al. (2021)     | [95]  |
| Effect of temperature on growth, photosynthesis and biochemical composition of <i>Nannochloropsis oceanica</i> , grown outdoors in tubular photobioreactors                              | 10.1016/j.algal.2020.101923       | Carneiro et al. (2020)    | [80]  |
| Industrial production of <i>Phaeodactylum tricornutum</i> for CO <sub>2</sub> mitigation: biomass productivity and photosynthetic efficiency using photobioreactors of different volumes | 10.1007/s10811-019-1750-0         | Quelhas et al. (2019)     | [96]  |
| Operation Regimes: A Comparison Based on <i>Nannochloropsis oceanica</i> Biomass and Lipid Productivity                                                                                  | 10.3390/en14061542                | Guerra et al. (2021)      | [81]  |
| A validated thermal and biological model for predicting algal productivity in large scale outdoor cultivation systems                                                                    | 10.1016/j.algal.2021.102224       | Greene et al. (2021)      | [71]  |
| Scale-up and large-scale production of <i>Tetraselmis</i> sp. CTP4 (Chlorophyta) for CO <sub>2</sub> mitigation: from an agar plate to 100-m <sup>3</sup> industrial photobioreactors    | 10.1038/s41598-018-23340-3        | Pereira et al. (2018)     | [120] |
| Comparing EPA production and fatty acid profiles of three <i>Phaeodactylum tricornutum</i> strains under western Norwegian climate conditions                                            | 10.1016/j.algal.2017.12.001       | Steinrücken et al. (2018) | [97]  |
| Oil and Eicosapentaenoic Acid Production by the Diatom <i>Phaeodactylum tricornutum</i> Cultivated Outdoors in Green Wall Panel (GWPW) Reactors                                          | 10.1002/bit.26353                 | Rodolfi et al. (2017)     | [98]  |
| Productivity and biochemical composition of <i>Tetrademus obliquus</i> and <i>Phaeodactylum tricornutum</i> : effects of different cultivation approaches                                | 10.1007/s10811-016-0876-6         | Buono et al. (2016)       | [99]  |
| Shear stress tolerance and biochemical characterization of <i>Phaeodactylum tricornutum</i> in quasi steady-state continuous culture in outdoor photobioreactors                         | 10.1016/S1369-703X(03)00072-X     | Mirón et al. (2003)       | [100] |
| Turbidostat operation of outdoor pilot-scale photobioreactors                                                                                                                            | 10.1016/j.algal.2016.06.006       | de-Vree et al. (2016)     | [88]  |
| Seasonal Variation of Lipids and Fatty Acids of the Microalgae <i>Nannochloropsis oculata</i> Grown in Outdoor Large-Scale Photobioreactors                                              | 10.3390/en5051577                 | Olofsson et al. (2012)    | [83]  |
| Productivity and biochemical composition of <i>Phaeodactylum tricornutum</i> (Bacillariophyceae) cultures grown outdoors in tubular photobioreactors and open ponds                      | 10.1016/j.biombioe.2013.03.016    | Benavides et al. (2013)   | [101] |
| Photoacclimation of <i>Phaeodactylum tricornutum</i> (Bacillariophyceae) cultures grown outdoors in photobioreactors and open ponds                                                      | 10.1080/09670262.2012.683202      | Torzillo et al. (2012)    | [102] |
| Productivity and photosynthetic efficiency of outdoor cultures of <i>Tetraselmis suecica</i> in annular columns                                                                          | 10.1016/j.aquaculture.2006.08.011 | Zittelli et al. (2006)    | [118] |
| Energy balance of algal biomass production in a 1-ha “Green Wall Panel” plant: How to produce algal biomass in a closed reactor achieving a high Net Energy Ratio                        | 10.1016/j.apenergy.2015.01.086    | Tredici et al. (2015)     | [119] |
| Marine microalgae for outdoor biomass production—A laboratory study simulating seasonal light and temperature for the west coast of Sweden                                               | 10.1111/ppl.13412                 | Cheregi et al. (2021)     | [84]  |
| Production of Microalgal Slow-Release Fertilizer by Valorizing Liquid Agricultural Digestate: Growth Experiments with Tomatoes                                                           | 10.3390/app10113890               | Jimenez et al. (2020)     | [74]  |

**Table S2.** List of documents published on algal cultivation in outdoor PBRs.

| Title                                                                                                                  | Inventors [Reference]                                                                     | Patent number    | Country        | Year | Current Assignee                                   |
|------------------------------------------------------------------------------------------------------------------------|-------------------------------------------------------------------------------------------|------------------|----------------|------|----------------------------------------------------|
| Impianto perfezionato per la coltura in strato laminate sottile dei microorganismi fotosintetici.                      | M. R. Tredici, D. Mannelli, and R. Materassi [48]                                         | 9357 A/88 - CNR  | Italy          | 1988 | -                                                  |
| Process of outdoor thin-layer cultivation of microalgae and blue-green algae and bioreactor for performing the process | Jiri Doucha, Karel Livansky [135]                                                         | US5981271A       | Czech Republic | 1999 | Mikrobiologický Ústav Akademie Věd České Republiky |
| Photobioreactor with improved supply of light by surface enlargement, wavelength shifter bars or light transport       | Walter Trösch, Ulrike Schmid-Staiger, Armin Zastrow, Alexander Retze, Franz Brucker [155] | US6509188B 1     | Germany        | 2003 | SUBITEC GmbH                                       |
| Reactor for industrial culture of photosynthetic micro-organisms                                                       | Mario Tredici, Liliana Rodolfi [156]                                                      | EP1599570A 2     | Italy          | 2004 | Università degli Studi di Firenze                  |
| Photobioreactor systems and methods for growing organisms                                                              | Matthew W. Eckerle, Thomas W. Chalberg, JR., Cheryl A. Hackworth, Michael B. Fertik [136] | US20090203 067A1 | USA            | 2009 | New American Energy, Inc. (U.S.)                   |
